# Supplementary material for: Relevance of pepsinogen, gastrin, and endoscopic atrophy in the diagnosis of autoimmune gastritis
Source: PubMed Central journal article supplement (PMC8913737; doi:10.1038/s41598-022-07947-1), 2022-03-10
Supplement: 41598_2022_7947_MOESM1_ESM.pdf [file 41598_2022_7947_MOESM1_ESM.pdf]

**Relevance of Pepsinogen, Gastrin, and Endoscopic Atrophy in the Diagnosis of  
Autoimmune Gastritis**

Hiroshi Kishikawa, Kenji Nakamura, Keisuke Ojio, Tadashi Katayama, Kyoko Arahata,  
Sakiko Takarabe, Aya Sasaki, Soichiro Miura, Yukie Hayashi, Hitomi Hoshi, Takanori Kanai,  
and Jiro Nishida

**Supplementary Table S1.** Histological findings of autoimmune gastritis

---

| Histological findings                             | N (%)         |
|---------------------------------------------------|---------------|
| Oxyntic mucosal atrophy                           | 31/31 (100%)  |
| Pseudo-pyloric or intestinal metaplasia           | 28/31 (90.3%) |
| Pseudo-pyloric metaplasia                         | 19/31 (61.3%) |
| Intestinal metaplasia                             | 25/31 (80.6%) |
| Decreased proportion of gastric pits/gastric duct | 27/31 (87.1%) |
| Diffuse lymphocyte cell infiltration              | 31/31 (100%)  |
| Enterochromaffin-like cell hyperplasia            | 6/31 (19.4%)  |

---

**Supplementary Table S2.** Interobserver variability in endoscopic diagnosis suggestive of autoimmune gastritis among the three endoscopists

| Endoscopic findings                                                  | Kappa value (95% CI) |                     |                     | Mean ± SD  |
|----------------------------------------------------------------------|----------------------|---------------------|---------------------|------------|
|                                                                      | KN to YH             | KN to HH            | YH to HH            |            |
| Endoscopic atrophic grade*                                           | 0.698 (0.657-0.740)  | 0.643 (0.595-0.691) | 0.621 (0.574-0.667) | 0.654±0.04 |
| Disappearance of the gastric fold                                    | 0.684 (0.558-0.811)  | 0.539 (0.409-0.669) | 0.642 (0.522-0.763) | 0.622±0.07 |
| Corpus predominant advanced atrophy in comparison to the antral part | 0.309 (0.149-0.470)  | 0.255 (0.076-0.435) | 0.441 (0.272-0.610) | 0.335±0.1  |
| Sticky mucosa                                                        | 0.235 (0.119-0.351)  | 0.240 (0.108-0.372) | 0.580 (0.470-0.691) | 0.352±0.2  |
| Hyperplastic polyp                                                   | 0.582 (0.369-0.795)  | 0.505 (0.250-0.759) | 0.461 (0.231-0.690) | 0.516±0.06 |

CI, confidence interval; SD, standard deviation.

\* Kappa value was regarded as “moderate (0.6–0.8)” based on the Landis and Koch scale and was used as an analyzed item.

**Supplementary Table S3.** Baseline characteristics of patients with severe endoscopic atrophy ( $\geq$ O3 on the Kimura–Takemoto classification)

| <b>Baseline characteristics</b>                            | <b>Autoimmune gastritis (N=27)</b> | <b>Non-autoimmune gastritis (N=31)</b> | <b>P-value*</b> |
|------------------------------------------------------------|------------------------------------|----------------------------------------|-----------------|
| Male, N (%)                                                | 15 (55.6%)                         | 18 (58.1%)                             | 0.847           |
| Age, years, median (IQR)                                   | 73 (68–76)                         | 75 (70–76)                             | 0.419           |
| Pepsinogen I (ng/mL), median (IQR)                         | 5.9 (3.7–9.4)                      | 18.9 (15.1–32.7)                       | <0.001*         |
| Pepsinogen II (ng/mL), median (IQR)                        | 7.4 (4.9–9.2)                      | 6.1 (4.6–14.4)                         | 0.806           |
| Pepsinogen I/II ratio, median (IQR)                        | 0.9 (0.6–1.2)                      | 3.3 (1.2–4.3)                          | <0.001*         |
| <i>H. pylori</i> antibody titer $\geq$ 10 U/ml, N (%)      | 2/27 (7.4%)                        | 17/31 (54.8%)                          | <0.001*         |
| <i>H. pylori</i> infection status                          |                                    |                                        |                 |
| uninfected/present infection/<br>eradicated/past infection | 17/4/6/0 (63.0%/14.8/22.2%/0%)     | 0/17/11/3 (0%/54.8%/35.5%/9.7%)        | <0.001*         |
| Gastrin (pg/mL), median (IQR)                              | 1500 (637–2830)                    | 196 (108–561)                          | <0.001*         |
| <100/100–350/350–1,000/>1,000 pg/mL                        | 0/1/8/18 (0%/3.7%/29.6%/66.7%)     | 7/16/5/3 (22.6%/51.6%/16.1%/9.7%)      | <0.001*         |
| Anti-parietal cell antibody positive, N (%)                | 25/27 (92.6%)                      | 0/31 (0%)                              | <0.001*         |
| Anti-intrinsic factor antibody positive, N (%)             | 15/25 (60%)                        | NA                                     | NA              |
| Endoscopic atrophic border <sup>†</sup> , N (%)            |                                    |                                        |                 |
| O3/O4                                                      | 7/20 (25.9%/74.1%)                 | 22/9 (71.0%/29.0%)                     | <0.01*          |
| Disappearance of the gastric fold, N (%)                   | 19/27 (70.4%)                      | 16/31 (51.6%)                          | 0.145           |

Data are provided as numbers (%) or median (interquartile range [IQR]).

\* *P*-value: Fisher’s exact test or Man–Whitney *U* test; autoimmune gastritis vs. non-autoimmune gastritis.
